# Supplementary material for: Associations between Timing and Duration of Eating and Glucose Metabolism: A Nationally Representative Study in the U.S
Source: MDPI journal article supplement (doi:10.3390/nu15030729), 2023-02-01
Supplement: s1 [file s1]

## Supplemental Material for

**Title:** Associations between Timing and Duration of Eating and Glucose Metabolism: A Nationally Representative Study in the U.S.

**Authors:** Marriam Ali, MD, Sirimon Reutrakul, MD, Gregory Petersen, PhD, Kristen L. Knutson, PhD

**Journal:** *Nutrients*

This document contains the following supplemental material:

1. Results from regression analyses examining associations between dietary timing variables and fasting glucose and HOMA-IR excluding respondents with diabetes.
2. Results from regression analyses examining associations between dietary timing variables and caloric and nutrient intake.

**Table S1: Results from regression models examining associations between fasting glucose, HOMA-IR and eating duration and start time excluding respondents with diabetes (n=7,299).**

|                           | (ln) Fasting Glucose |                   | (ln) HOMA-IR     |                   |
|---------------------------|----------------------|-------------------|------------------|-------------------|
|                           | Regression Coeff     | 95% CI            | Regression Coeff | 95% CI            |
| Eating Duration (hours)   | .002                 | -.001, .004       | -.001            | -.013, .011       |
| Eating Start Time (hours) | <b>.005</b>          | <b>.003, .007</b> | <b>.028</b>      | <b>.012, .043</b> |

<sup>a</sup> Models are adjusted for age, gender, BMI, race/ethnicity, education, sleep duration, total kcal/day, smoking, alcohol use, and wave of data.

**Bold** indicates p<.05.

**Table S2: Results from regression models examining associations between eating duration and start time and caloric and nutrient intake (n=7,619).**

|                       | Total Kcal                     | Protein (g)                  | Total carbohydrates (g)      | Total sugars (g)          | Total fat (g)                 | Total saturated fatty acids (g) | Total monounsaturated fatty acids (g) | Total polyunsaturated fatty acids (g) | Dietary fiber (g)            |
|-----------------------|--------------------------------|------------------------------|------------------------------|---------------------------|-------------------------------|---------------------------------|---------------------------------------|---------------------------------------|------------------------------|
|                       | Reg Coeff (95% CI)             | Reg Coeff (95% CI)           | Reg Coeff (95% CI)           | Reg Coeff (95% CI)        | Reg Coeff (95% CI)            | Reg Coeff (95% CI)              | Reg Coeff (95% CI)                    | Reg Coeff (95% CI)                    | Reg Coeff (95% CI)           |
| Model 1 <sup>a</sup>  |                                |                              |                              |                           |                               |                                 |                                       |                                       |                              |
| Eating Duration (h)   | <b>104.7</b><br>(91.3 – 118.2) | <b>3.1</b><br>(2.3 – 3.8)    | <b>13.0</b><br>(11.1 – 15.0) | <b>7.6</b><br>(6.3 – 8.9) | <b>4.1</b><br>(3.4 – 4.7)     | <b>1.5</b><br>(1.3 – 1.8)       | <b>1.5</b><br>(1.2 – 1.7)             | <b>0.8</b><br>(0.7 – 1.0)             | <b>0.5</b><br>(0.3 – 0.8)    |
| Eating Start Time (h) | <b>44.3</b><br>(29.4 – 59.2)   | 0.45<br>(-0.37 – 1.26)       | <b>5.9</b><br>(3.7 – 8.2)    | <b>3.9</b><br>(2.5 – 5.4) | <b>1.9</b><br>(1.2 – 2.6)     | <b>0.8</b><br>(0.5 – 1.0)       | <b>0.6</b><br>(0.4 – 0.9)             | <b>0.3</b><br>(0.1 – 0.5)             | -0.1<br>(-0.4 – 0.1)         |
| Model 2 <sup>b</sup>  |                                |                              |                              |                           |                               |                                 |                                       |                                       |                              |
| Eating Duration (h)   |                                | -0.4<br>(-0.9 – 0.1)         | <b>1.1</b><br>(0.8 – 2.1)    | <b>2.0</b><br>(0.9 – 3.0) | <b>-0.4</b><br>(-0.8 – -0.04) | 0.05<br>(-0.1 – 0.2)            | <b>-0.2</b><br>(-0.4 – -0.03)         | <b>-0.1</b><br>(-0.3 – -.005)         | -0.1<br>(-0.3 – 0.1)         |
| Eating Start Time (h) |                                | <b>-1.0</b><br>(-1.6 – -0.5) | 0.9<br>(-0.3 – 2.1)          | <b>1.5</b><br>(0.4 – 2.7) | 0.02<br>(-0.4 – 0.5)          | <b>0.1</b><br>(-0.1 – 0.3)      | -0.1<br>(-0.2 – 0.1)                  | -0.1<br>(-0.2 – 0.1)                  | <b>-0.4</b><br>(-0.7 – -.02) |

<sup>a</sup> Model 1 is adjusted for age, gender, BMI, race/ethnicity, education, diabetes, sleep duration, total kcal/day, smoking, alcohol use, and wave of data.

<sup>b</sup> Model 2 adjusts for Model 1 covariates + total kcal.

**Bold** indicates p<.05.
